# Supplementary material
Source: publisher site journal article supplement (https://www.dovepress.com/get_supplementary_file.php?f=340941.docx)
Supplement: Supplementary file 1 [file get_supplementary_file.php]

Table S1

Information of enrolled genetic variations.

| Gene | SNP ID | Chromosome position | Allele | Position | Hardy-Weinberg equilibrium |
| --- | --- | --- | --- | --- | --- |
| *DNMT1* | rs16999593 | 19:10180505 | T/C | Exon 4 | 0.372 |
| *DNMT1* | rs10420321 | 19: 10189741 | A/G | Intron 1 | 0.068 |
| *DNMT1* | rs2228612 | 19:10162696 | A/G | Exon 12 | 0.184 |
| *DNMT1* | rs7560488 | 2:25345952 | T/C | Promoter | 0.634 |
| *DNMT3A* | rs13420827 | 2:25231099 | C/G | 3'UTR | 0.524 |
| *DNMT3A* | rs1550117 | 2:25343038 | G/A | Promoter | 0.600 |
| *DNMT3B* | rs1569686 | 20:32779273 | T/G | Promoter | 0.603 |
| *MTHFR* | rs1476413 | 1:11792243 | C/T | Intron 10 | 0.501 |
| *MTHFR* | rs1801131 | 1:11794419 | T/G | Exon 7 | 0.643 |

Table S2

Clinical and demographic characteristics of the enrolled participants

| Variables | Cases, n (%) | Healthy controls, n (%) | p-value |
| --- | --- | --- | --- |
| **All subjects** | 490 | 488 |  |
| **Age (Mean ± SD)** | 64.6±11.9 | 64.9±11.8 | 0.748 |
| **Gender** |  |  |  |
| Male | 358(73.1) | 358(73.4) | 0.916 |
| Female | 132(26.9) | 130(26.6) |  |
| ***H. pylori* infection** |  |  |  |
| Positive | 269(54.9) | 238(48.8) | 0.055 |
| Negative | 221(45.1) | 250(51.2) |  |
| **Cigarette smoking** |  |  |  |
| Never | 374(76.3) | 425(87.1) | <0.001 |
| Ever | 116(23.7) | 63(12.9) |  |
| **Alcohol consumption** |  |  |  |
| No | 436(89.0) | 466(95.5) | <0.001 |
| Yes | 54(11.0) | 22(4.5) |  |
| **TNM stage** |  |  |  |
| I- | 158(32.2) |  |  |
| - | 332(67.8) |  |  |
| **Tumor site** |  |  |  |
| Cardia | 140(28.6) |  |  |
| Non-cardia | 350(71.4) |  |  |
